# Supplementary material for: A supramolecular two-photon-active hydrogel platform for direct bioconjugation under near-infrared radiation
Source: Royal Society of Chemistry journal article supplement (doi:10.1039/c4tb01619j), 2014-12-17
Supplement: c4tb01619j1.pdf [file c4tb01619j1.pdf]

## Electronic Supplementary Information

### A supramolecular two-photon-active hydrogel platform for direct bioconjugation under near-infrared radiation

Antonio Paciello<sup>ab</sup> and M. Gabriella Santonicola<sup>\*cd</sup>

<sup>a</sup> Center for Advanced Biomaterials for Healthcare, Istituto Italiano di Tecnologia, Largo Barsanti e Matteucci 53, 80125 Naples, Italy

<sup>b</sup> Interdisciplinary Research Centre on Biomaterials (CRIB), University of Naples Federico II, Piazzale Tecchio 80, 80125 Naples, Italy

<sup>c</sup> Department of Chemical Materials and Environmental Engineering, Sapienza University of Rome, Via del Castro Laurenziano 7, 00161 Rome, Italy

<sup>d</sup> Materials Science and Technology of Polymers, MESA+ Institute for Nanotechnology, University of Twente, 7500 AE Enschede, The Netherlands

\*E-mail: mariagabriella.santonicola@uniroma1.it

#### Experimental

##### *NMR data analysis: calculation of PEI methacrylation*

The extent of methacrylation of branched PEI was determined by the analysis of <sup>1</sup>H NMR spectra using the following formulas (Forrest *et al.*, *Pharm. Res.*, 2004):

$$\text{methacrylated secondary amines (\%)} = \left( \frac{E_{bb}}{4} \cdot \frac{3}{M'} \cdot N' \right)^{-1} \cdot 100\%$$

$$\text{methacrylated tertiary amines (\%)} = \left( \frac{E_{bb}}{4} \cdot \frac{3}{M''} \cdot N'' \right)^{-1} \cdot 100\%$$

where  $M'$  is the integration of  $\delta$  1.70-1.75 peaks corresponding to methacrylated secondary amines [ $-\text{NH}-\text{COC}(\text{CH}_2)\text{CH}_3$ ],  $M''$  is the integration of  $\delta$  2.0-2.1 peaks corresponding to methacrylated tertiary amines [ $>\text{N}-\text{COC}(\text{CH}_2)\text{CH}_3$ ], and  $E_{bb}$  is the integration of  $\delta$  2.5-3.0 peaks corresponding to ethylene backbone.

$N'$  and  $N''$  are the mole fractions of PEI primary and secondary amines, 0.31 and 0.39 respectively, based on the analysis of the commercial PEI starting material by <sup>13</sup>C NMR (von Harpe *et al.*, *J. Controlled Release*, 2000).

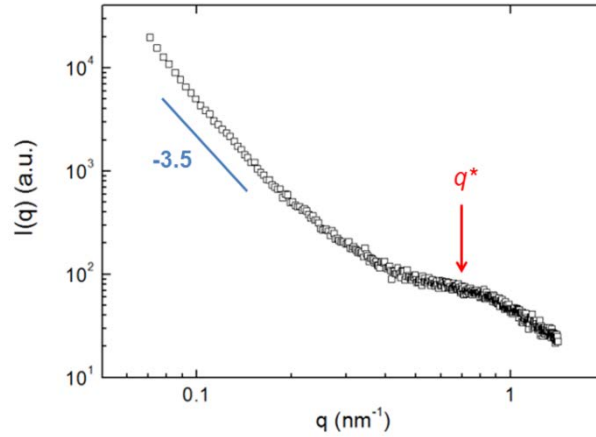

**Fig. S1** Small angle X-ray scattering (SAXS) profile in log-log plot of swollen PEIMA hydrogel obtained at room temperature, showing a steep intensity decay at lower  $q$  values (slope  $-3.5$ ) and a broad peak at  $0.7 \text{ nm}^{-1}$ .

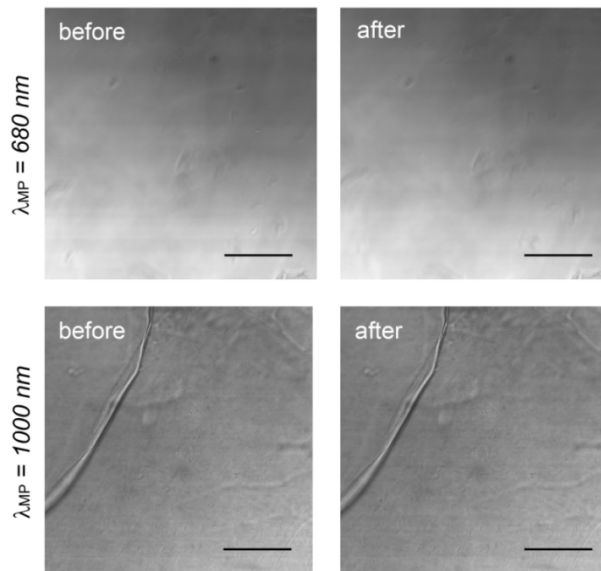

**Fig. S2** Microscopy images showing control experiments for photopatterning of PEIMA supramolecular hydrogel. White light transmission images of PEIMA hydrogel in a solution without functional probes. No imprinting is visible before and after multiphoton laser irradiation at wavelengths of  $680 \text{ nm}$  (top) and  $1000 \text{ nm}$  (bottom). Scale bars are  $100 \mu\text{m}$ .
